# Supplementary material for: Dissolved oxygen from microalgae-gel patch promotes chronic wound healing in diabetes
Source: PubMed Central journal article supplement — Sci Adv. 2020 May 15;6(20):eaba4311. doi: 10.1126/sciadv.aba4311 (PMC7228761; doi:10.1126/sciadv.aba4311), 2020-05-15
Supplement: aba4311_SM.pdf [file aba4311_SM.pdf]

## Supplementary Materials for

### **Dissolved oxygen from microalgae-gel patch promotes chronic wound healing in diabetes**

Huanhuan Chen, Yuhao Cheng, Jingrun Tian, Peizheng Yang, Xuerao Zhang, Yunhao Chen, Yiqiao Hu\*, Jinhui Wu\*

\*Corresponding author. Email: [huyiqiao@nju.edu.cn](mailto:huyiqiao@nju.edu.cn) (Y.H.); [wuj@nju.edu.cn](mailto:wuj@nju.edu.cn) (J.W.)

Published 15 May 2020, *Sci. Adv.* **6**, eaba4311 (2020)

DOI: 10.1126/sciadv.aba4311

#### **This PDF file includes:**

Figs. S1 to S8

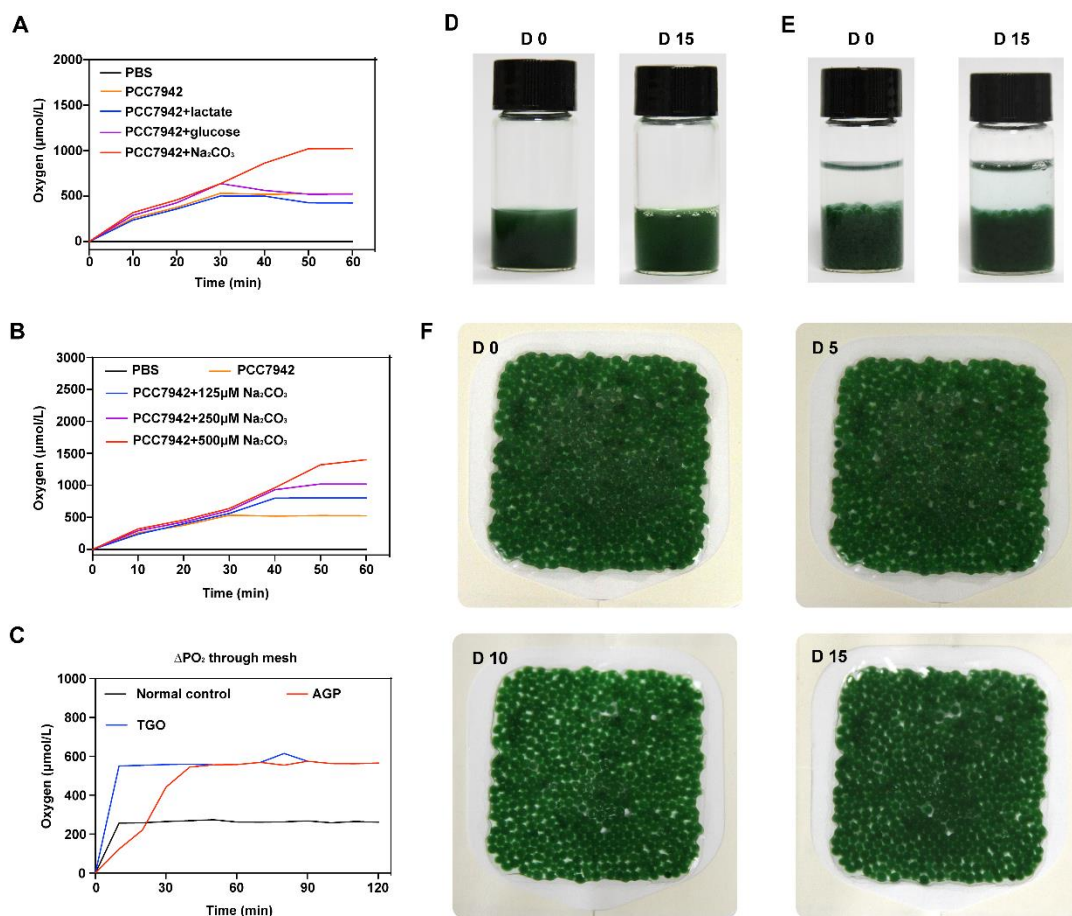

**Fig. S1. Releasing dissolved oxygen of *S. elongatus* PCC7942.** (A) Comparison releasing dissolved oxygen of *S. elongatus* PCC7942 with different carbon source. (B) Comparison releasing dissolved oxygen between the *S. elongatus* PCC7942 ( $1 \times 10^9$  cells/mL) supplement with different concentration of  $\text{Na}_2\text{CO}_3$ . (C) Transfer of dissolved oxygen for control recording into saline at 37 °C. (D and E) Images of *S. elongatus* PCC7942 solution and alga-gel at day 0, 15 at 4 °C. (F) Images of AGP at day 0, 5, 10, 15 at 4 °C, respectively.

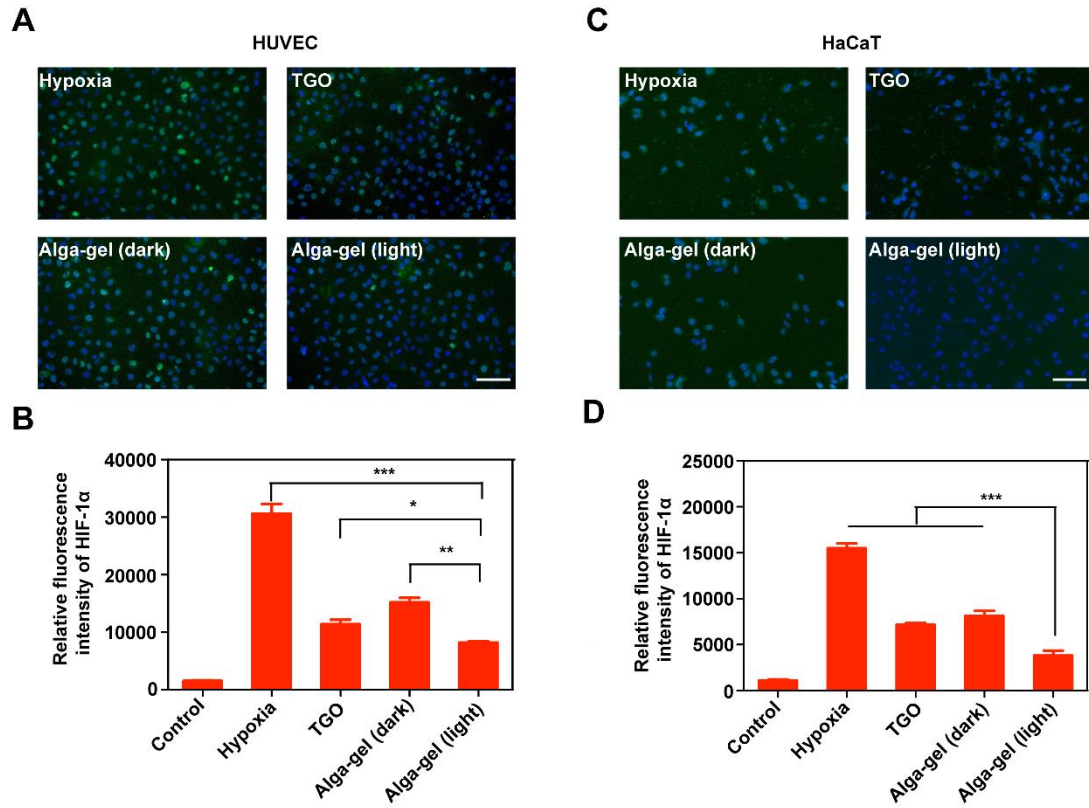

**Fig. S2. The expression of HIF-1 $\alpha$  on high glucose induced-cells. (A and B)** The expression of HIF-1 $\alpha$  on high glucose induced in HUVECs (n=3). Scale bars, 200  $\mu$ m. **(C and D)** The expression of HIF-1 $\alpha$  on high glucose induced in HaCaT (n=3). Scale bars, 200  $\mu$ m. Significantly different (one-way ANOVA): \*  $P < 0.05$ ; \*\*  $P < 0.01$ ; \*\*\*  $P < 0.001$ .

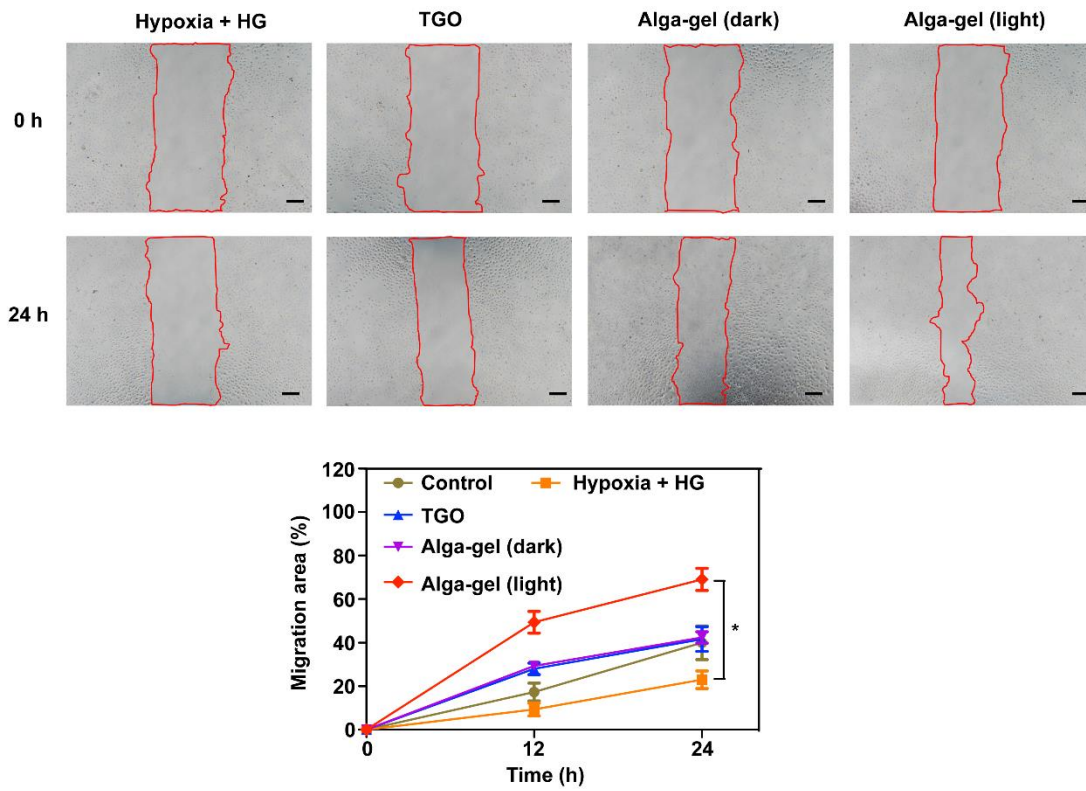

**Fig. S3. Alga-gel promotes HUVEC cell-migration.** (A and B) Representative images and quantification of HUVEC cell-migration (n=3). Scale bars: 200  $\mu$ m. Significantly different (one-way ANOVA): \*  $P < 0.05$ .

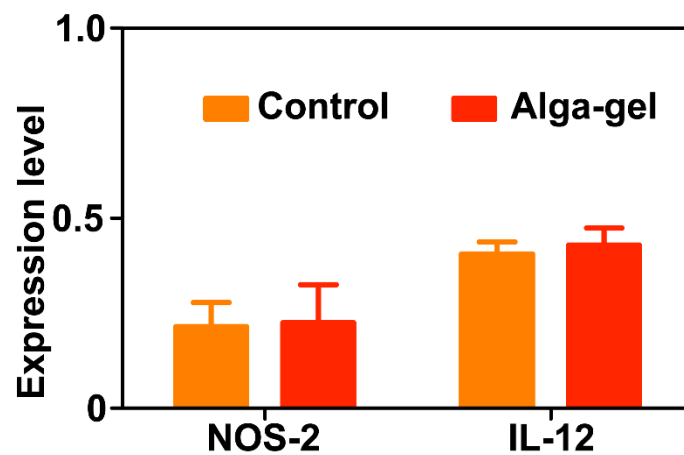

**Fig. S4. Alga-gel does not evoke immune response.**

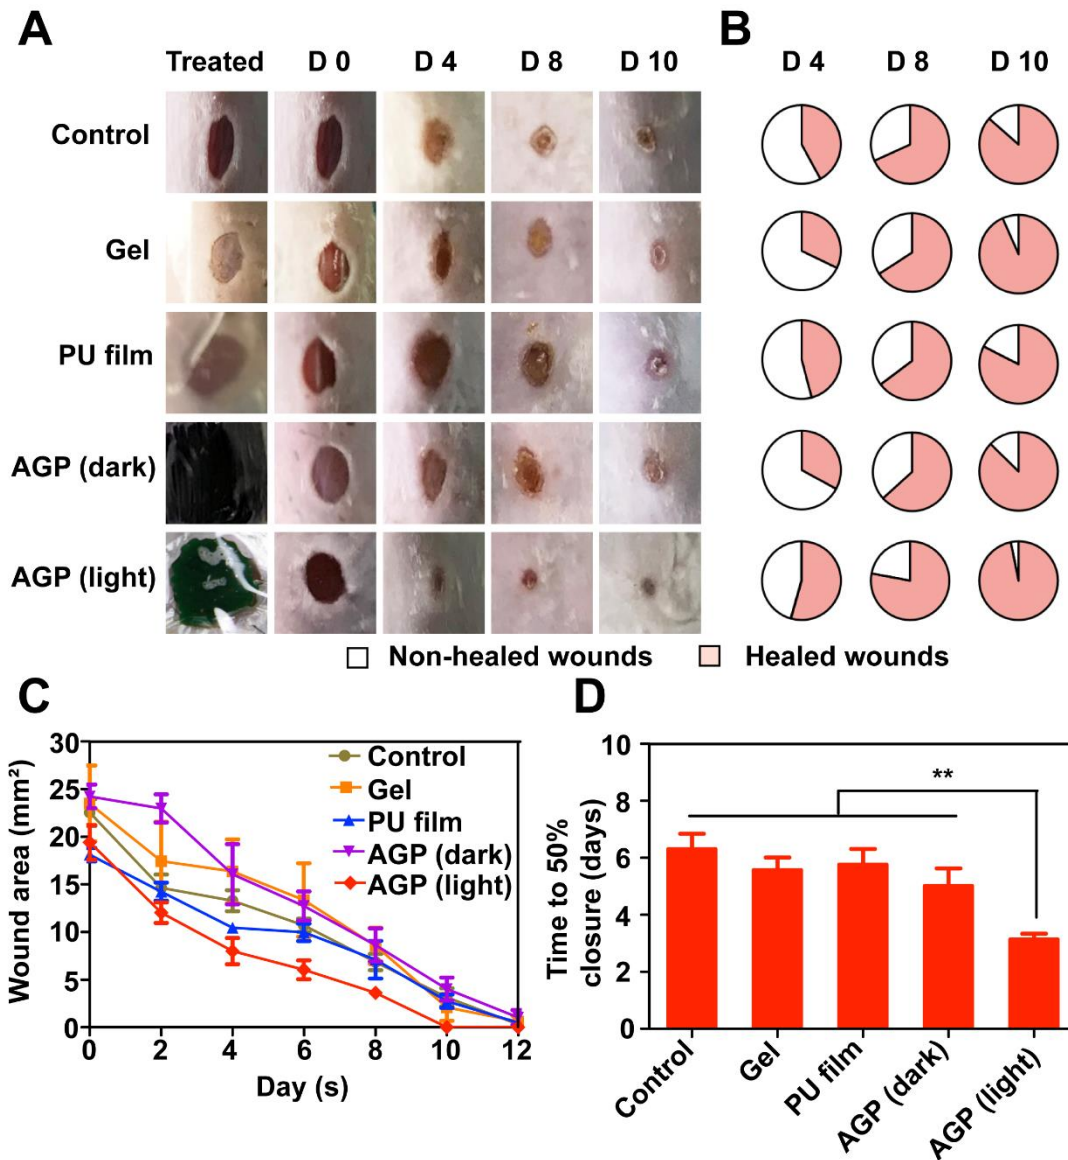

**Fig. S5. AGP promoted acute wound healing.** (A) Representative images of the wound area by different treatments on day 0, 4, 8 and 10 after operation. (B) Fractions of wounds healed by different treatments at days 0, 4, 8 and 10. (C) Wound area over time in mice by different treatment. (D) Summary of the 50% wound-closure times ( $n \geq 6$ ). Significantly different (one-way ANOVA):  $**P < 0.01$ .

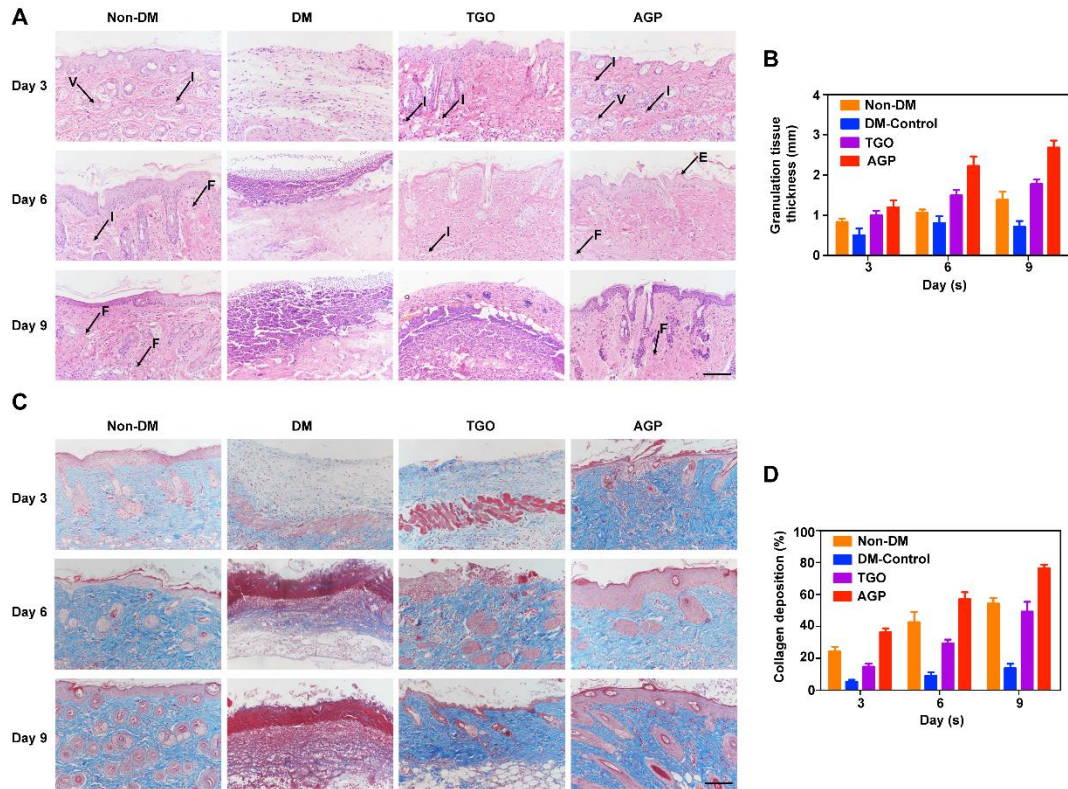

**Fig. S6. Wound healing at the inflammatory and proliferative stages in different groups.** (A and B) H&E staining of the wound area reflected the regenerated skin at day 3, 6, 9 (n=3). Scale bars, 100  $\mu$ m. (C and D) Masson staining of the wound area reflected the regenerated skin at day 3, 6, 9 (n=3). Scale bars, 100  $\mu$ m. (V vessels; Fibroblast cell; I inflammatory cell; F fibroblast cells; E epidermis)

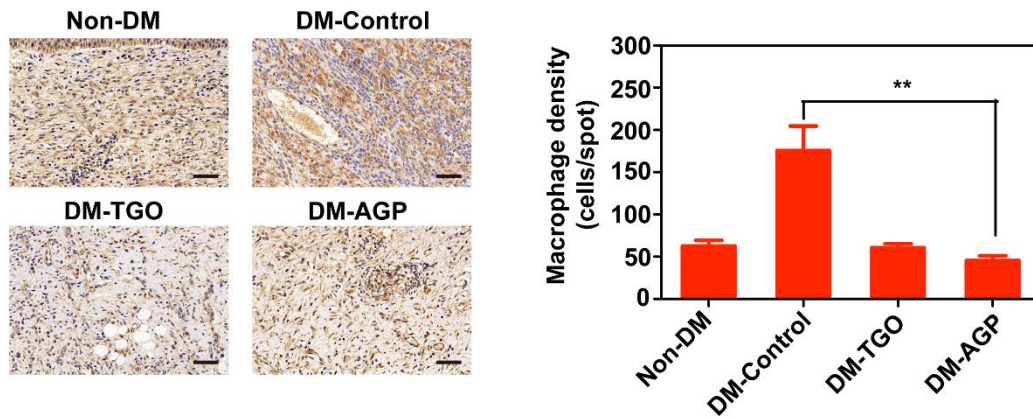

**Fig. S7.** The immunohistochemical images the average macrophage densities in different groups at day 9 (n=3). Scale bars, 50  $\mu$ m. Significantly different (one-way ANOVA): \*\*  $P < 0.01$ .

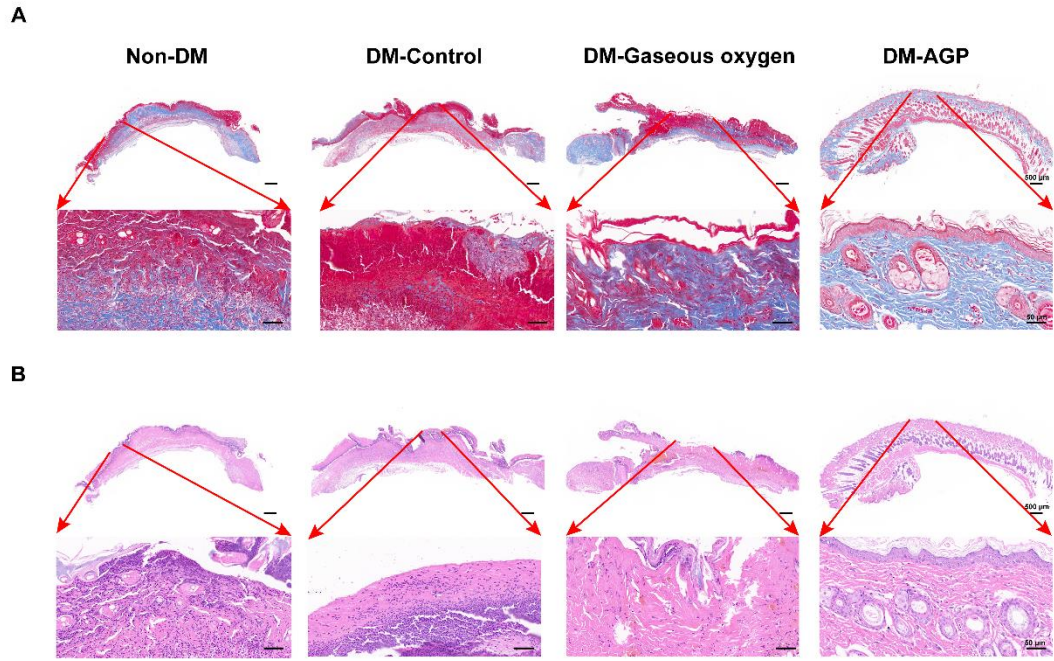

**Fig. S8. Staining of the flap necrosis in different groups at day 6. (A and B)**  
Masson and H&E staining.
